# Supplementary material for: Fluorescent Chitosan Modified with Heterocyclic Aromatic Dyes
Source: MDPI journal article supplement (doi:10.3390/ma14216429), 2021-10-26
Supplement: s1 [file s1]

## Supplementary Materials

### Fluorescent Chitosan Modified with Heterocyclic Aromatic Dyes

Halina Kaczmarek 1,\*, Agnieszka Tafelska-Kaczmarek 1, Katarzyna Roszek 2, Joanna Czarnecka 2,

Beata Jędrzejewska 3 and Katarzyna Zblewska 1

1 Faculty of Chemistry, Nicolaus Copernicus University in Torun, 87-100 Toruń, Poland;

tafel@chem.umk.pl (A.T.-K.); k.zblewska@umk.pl (K.Z.)

2 Department of Biochemistry, Faculty of Biological and Veterinary Sciences, Nicolaus Copernicus University in Torun, 87-100 Toruń, Poland; kroszek@umk.pl (K.R.); j\_czar@umk.pl (J.C.)

3 Faculty of Chemical Technology and Engineering, UTP University of Science and Technology Bydgoszcz University of Science and Technology, Seminaryjna 3, 85-326 Bydgoszcz, Poland; beata@pbs.edu.pl

\* Correspondence: halina@umk.pl; Tel.: +48-56-6114312

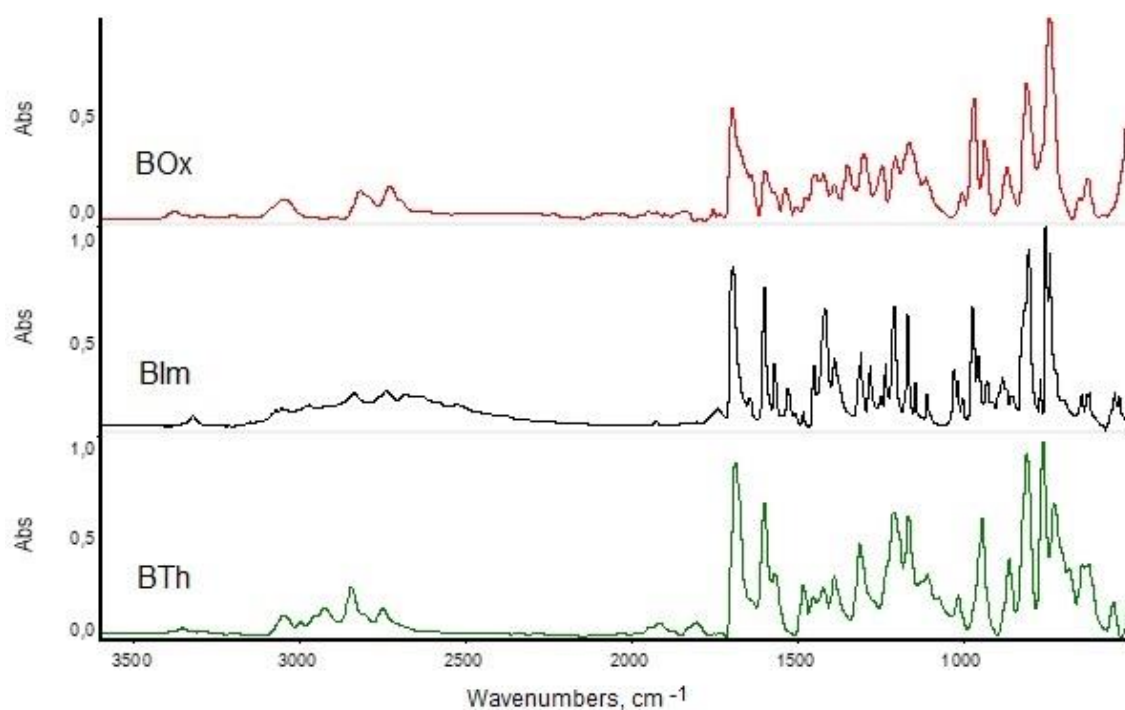

**Figure S1.** ATR-FTIR of three modifying compounds: BOx, BIm, and BTh.

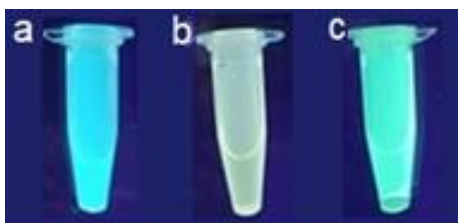

**Figure S2.** Fluorescence of chitosan derivatives upon 365 nm light: CS- BIm (a), CS-BOx (b), and CS-BTh (c).

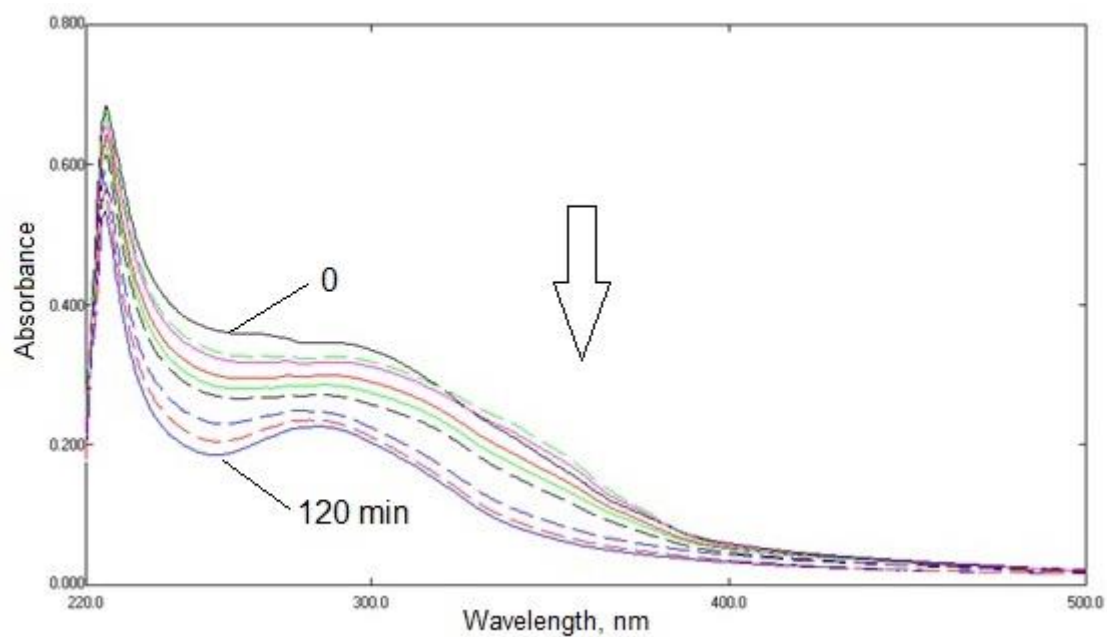

**Figure S3.** UV-Vis spectra of unmodified chitosan (2% solution in acetic acid) exposed to UV-C radiation in time up to 120 min, the arrow shows the direction of absorbance changes.

**a**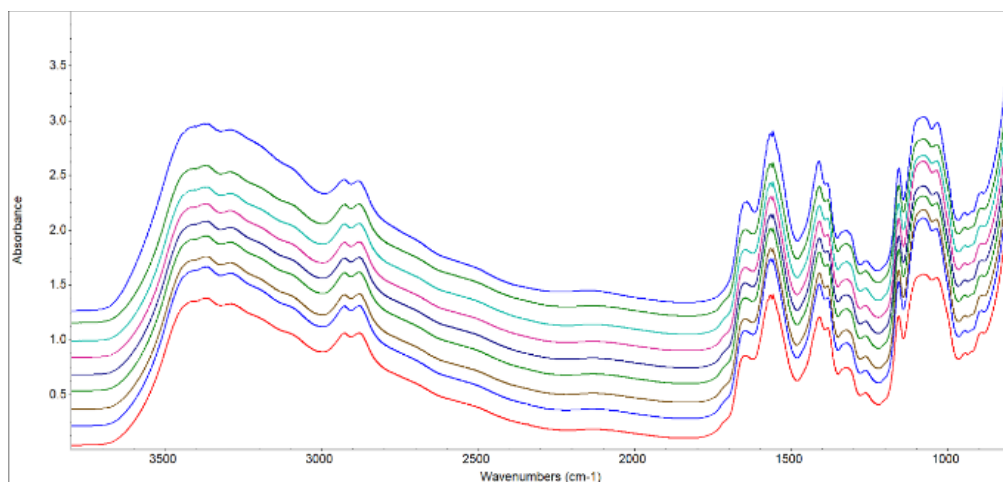**b**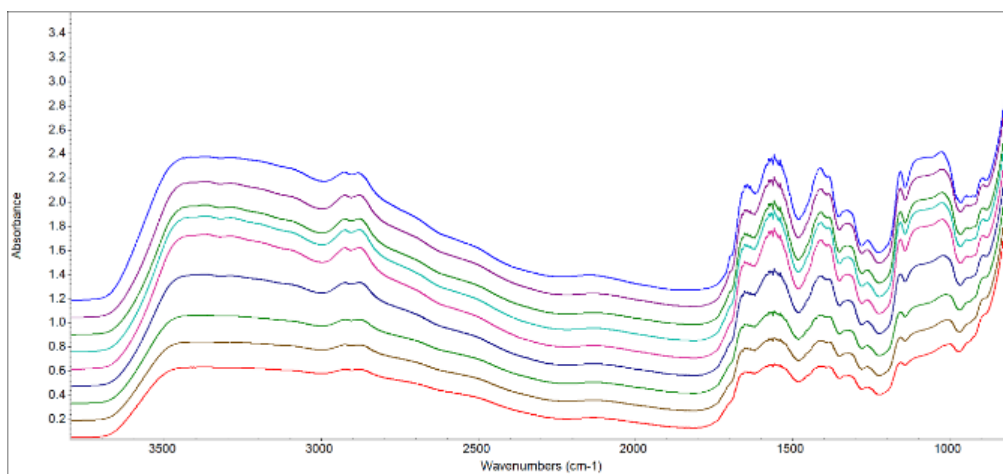**c**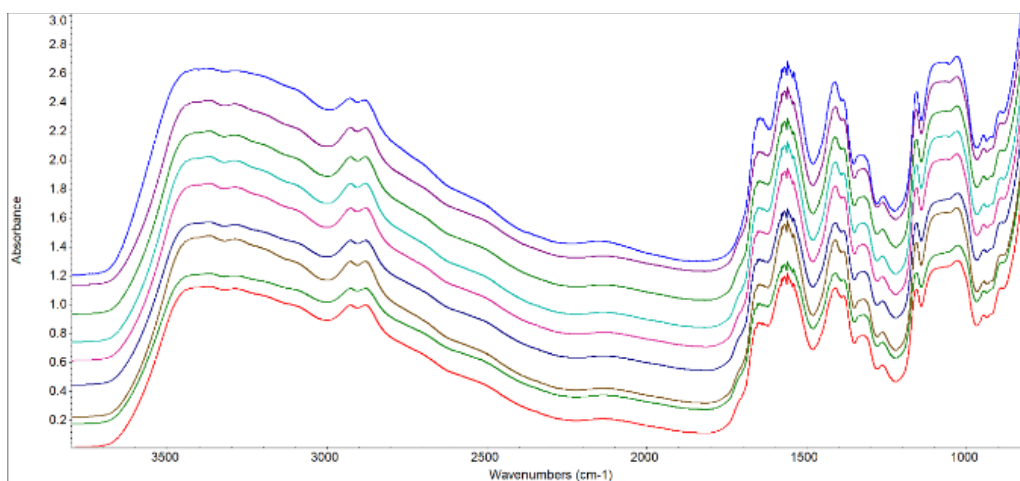

**Figure S4.** Changes in FTIR spectra (offset) of studied films during 0-8h UV-irradiation: CS-BIm (a), CS-BOx (b) and CS-BTh (c). The spectrum at the top corresponds to the unexposed sample, at the bottom - after 8h UV.
